# Supplementary material for: Temporal evolution of vasospasm and clinical outcome after intra-arterial vasodilator therapy in patients with aneurysmal subarachnoid hemorrhage
Source: PLoS One. 2017 Mar 24;12(3):e0174676. doi: 10.1371/journal.pone.0174676 (PMC5365119; doi:10.1371/journal.pone.0174676)
Supplement: S1 File — Hemodynamic data set underlying the findings. (XLSX) [file pone.0174676.s001.xlsx]

## Sheet: Mean PSV   
id	side	injection	case	injection_no	d-8	d-7	d-6	d-5	d-4	d-3	d-2	d-1	d+1	d+2	d+3	d+4	d+5	d+6	d+7	d+8	d+9	d+10	d+11	d+12
59	R	1st	1	1	103.25	160	170.5	178	204.5	207.33	229	291.2	299	378	228.6	324.2	179.8	340	232	306.4
59	L	1st	1	2	93.25	168.5	170.25	170	150.48	178	233.2	297	283.8	278	338.75	336.42	206.8	263.75	233.25	265.75
50	L	1st	2	3						176.4	177.66	258.2	205.04
45	R	1st	3	4				85.6	83.62	142.5	177.81	220	233.66	202.4
45	L	1st	3	5				96.6	107.83	214	176.33	232.75	187	277.8
37	L	1st	4	6		91.4	124.6				158.5	214.75	191.2	172.33	157.5	225.6
37	L	2nd	4	7							157.5	225.6	103.4
37	R	2nd	4	8							113.5	119	116.25	118	113	124.75	92	76.6
31	L	1st	5	9							272.4	325.2	355.5
20	R	1st	6	10							117.06	160	87.5
18	R	1st	7	11					88.8	139.75	188.8	248.8	252
18	L	2nd	7	12					79.25	115.28	213.8	248.8	275
17	R	1st	8	13	144.2	133.4	134	138	136	130.2	258.8	129.2	206.4	182.8	176	93.5	115.5
2	R	2nd	9	14						163.8	172.2	207.5	224.2	99.38	102.14	117.8	183.6	225.6	188.83	176.2	151.4	107.16
79	R	1st	10	15						258.8	255	298	321	286.6	280
79	R	2nd	10	16							286.6	280	258
85	L	1st	11	17							266	139	166	222
77	R	1st	12	18						167.4	232	238	219	272
77	L	1st	12	19						148	198	98	209	277
77	R	2nd	12	20							315.4	291.8	241	207
77	L	2nd	12	21							246.4	236.75	247	231
111	R	1st	13	22							174	260.8	217	211
114	R	1st	14	23							179.5	239	351.8
114	L	1st	14	24							204.4	314.3	304.75
105	R	1st	15	25							164.8	201.75	147.5	170.5
105	L	1st	15	26							205.5	167.5	172.8	180.3
92	R	1st	16	27							170.2	232.4	251.25	269.5	271.25
92	L	1st	16	28							110.4	351	327	152.11	165.8
92	R	2nd	16	29							269.5	271.25	154.6
92	L	2nd	16	30							152.11	165.8	182
72	R	1st	17	31	128.75	150.75	177.5	194.8	202	171.6	200.5	171	174	166.75	143
72	L	1st	17	32	130.33	136.75	186.6	189.2	192.5	200.2	204.5	192.25	191.5	174	144.83
63	L	1st	18	33						250.4	205.6	173	204	238.3	69	167.8	352.4	130.6	154.5	160	109.75	161.25	154.8	130.25
99	L	1st	19	34						217.8	184.25	316.75	236	223.5	148.25

## Sheet: Max PSV   
id	side	injection	case	injection_no	d-8	d-7	d-6	d-5	d-4	d-3	d-2	d-1	d+1	d+2	d+3	d+4	d+5	d+6	d+7	d+8	d+9	d+10	d+11	d+12
59	R	1st	1	1	109	166	175	191	212	241	274	375	405	403	249	355	253	318	246	321
59	L	1st	1	2	95	177	177	197	197	209	257	333	392	413	373	368	308	269	257	317
50	L	1st	2	3						224	245	292	267
45	R	1st	3	4				98	110	197	234	227	313	312
45	L	1st	3	5				100	127	229	216	250	315	325
37	L	1st	4	6			97	137			174	252	213	177	163	244
37	L	2nd	4	7							163	244	110	157	120	96	135	85
37	R	2nd	4	8							129	123	120	120	117	126	95	85
31	L	1st	5	9							291	337	360
20	R	1st	6	10							138	174	95.9
18	R	1st	7	11					99		223	306	357
18	L	2nd	7	12							278	339	430
17	R	1st	8	13	171	142	139	147	145	145	288	152	227	190	195	102	122
2	R	2nd	9	14						180	189	214	234	116	132	147	203	237	209	208	171	127
79	R	1st	10	15						282	276	357	339	331	297
79	R	2nd	10	16							331	297	342
85	L	1st	11	17							240	213	253	281
77	R	1st	12	18						181	252	281	275	296
77	L	1st	12	19						153	214	109	224	286
77	R	2nd	12	20							353	324	267	234
77	L	2nd	12	21							294	257	276	250
111	R	1st	13	22							248	269	231	233
114	R	1st	14	23							185	257	355
114	L	1st	14	24							220	347	306
105	R	1st	15	25							184	222	156	174
105	L	1st	15	26							225	182	178	190
92	R	1st	16	27							191	257	254	295	395
92	L	1st	16	28							127	359	347	211	274
92	R	2nd	16	29							295	395	169
92	L	2nd	16	30							211	274	219
72	R	1st	17	31	146	157	222	206	232	186	203	179	192	175	165
72	L	1st	17	32	133	142	222	201	202	214	229	213	196	178	163
63	L	1st	18	33						272	228	189	225	248	81	178	217	153	162	180	120	184	161	150
99	L	1st	19	34						289	288	323	239	260	175

## Sheet: Max MFV   
id	side	injection	case	injection_no	d-8	d-7	d-6	d-5	d-4	d-3	d-2	d-1	d+1	d+2	d+3	d+4	d+5	d+6	d+7	d+8	d+9	d+10	d+11	d+12
59	R	1st	1	1	71	116	108	118	130	141	174	224	270	270	148	234	161	208	149	202
59	L	1st	1	2	62	118	112	117	110	119	154	197	259	310	270	321	159	164	244	191
50	L	1st	2	3					58.1	144	187	217	190
45	R	1st	3	4				66	61	132	176	200	229
45	L	1st	3	5				69	69	153	153	198	224
37	L	1st	4	6
37	L	2nd	4	7
37	R	2nd	4	8
31	L	1st	5	9							190	220	251
20	R	1st	6	10							86.6	111	46.2
18	R	1st	7	11							135	211	234
18	L	2nd	7	12							185	215	304
17	R	1st	8	13	62.4	74	87	88	66.2	61.6	134	86	114	98.2	115	45	63
2	R	2nd	9	14						102	104	130	160	116
79	R	1st	10	15						166	166	232	239	221	209
79	R	2nd	10	16							221	209	239
85	L	1st	11	17							114	100	153	129
77	R	1st	12	18						127	116	171		186
77	L	1st	12	19						90	119	57.4		200
77	R	2nd	12	20							249	220	186	157
77	L	2nd	12	21							226	189	198	188
111	R	1st	13	22							167	168	143	155
114	R	1st	14	23							96	159	212
114	L	1st	14	24							131	211	303
105	R	1st	15	25							127	141	107	74
105	L	1st	15	26							149	107	123	83
92	R	1st	16	27							113	151	153	270	307
92	L	1st	16	28							113	242	219	145	188
92	R	2nd	16	29							270	307	98
92	L	2nd	16	30							145	188	132
72	R	1st	17	31	65	79	111	93	121	89	110	67	98	67	59
72	L	1st	17	32	55	72	117	100	112	100	126	99	95	62	53
63	L	1st	18	33						171	128	116	145	148	49	114	130	95	104	105	64	105	92	81
99	L	1st	19	34						192	218	215	179	156	130

## Sheet: Mean MFV   
id	side	injection	case	injection_no	d-8	d-7	d-6	d-5	d-4	d-3	d-2	d-1	d+1	d+2	d+3	d+4	d+5	d+6	d+7	d+8	d+9	d+10	d+11	d+12
59	R	1st	1	1	67	110	105.75	133	125	118.65	138.2	184.8	97	259.25	140.4	209.4	107	162.6	136.75	187.2
59	L	1st	1	2	60.25	111	107.75	101.8	86.31	101.4	139.2	185	173.5	197.24	245.5	257.14	120.26	160.75	168.25	157.5
50	L	1st	2	3					49.7	116.88	141.55	186.6	149.62
45	R	1st	3	4				58.4	47.6	93.5	123.54	147.25	170.16
45	L	1st	3	5				64.8	59.33	140.4	121	174.75	147.62
37	L	1st	4	6
37	L	2nd	4	7
37	R	2nd	4	8
31	L	1st	5	9							167.4	214.4	243.25
20	R	1st	6	10							71.3	98.47	42.35
18	R	1st	7	11							117.1	162	162.5
18	L	2nd	7	12							158.8	176.4	229.6
17	R	1st	8	13	56.14	68.2	81	77.2	65.075	56.22	120.6	72.2	105.46	92.72	100.8	38.66	60.5
2	R	2nd	9	14						93.88	98.2	124.7	150	99.38	57.9	68.52	118.6	146.2	123.66	106.22	92.7	64.06
79	R	1st	10	15						149.5	154	186	232	178.2	184
79	R	2nd	10	16							178.2	184	170
85	L	1st	11	17							62	67	94	101
77	R	1st	12	18						112.4	106	141		167
77	L	1st	12	19						87	99	45		191
77	R	2nd	12	20							221	199.4	160	144
77	L	2nd	12	21							184.4	171.5	178	166
111	R	1st	13	22							108	165	137	133
114	R	1st	14	23							94.3	147	199
114	L	1st	14	24							123.4	194.3	254.5
105	R	1st	15	25							107.2	123	93	72.25
105	L	1st	15	26							136.25	97.75	114.6	78
92	R	1st	16	27							103.8	139.8	144.25	208.25	172.25
92	L	1st	16	28							103.8	237.3	204.5	100.5	105.4
92	R	2nd	16	29
92	L	2nd	16	30
72	R	1st	17	31	57.75	75.75	88.1	88.2	110	81	106.75	64.25	87	62.5	54.5
72	L	1st	17	32	53.66	69	96.8	90.8	109.75	94.8	111	81.75	92.5	60.25	48.66
63	L	1st	18	33						157.2	121.6	103.5	129	141.6	42.25	106.6	122.6	81.4	96.25	94.6	61.75	94.75	89	72
99	L	1st	19	34						143.4	123.25	212.5	171.75	143.75	96.22
